# Supplementary material for: Acquired Cross-Resistance in Small Cell Lung Cancer due to Extrachromosomal DNA Amplification of MYC Paralogs
Source: PubMed Central journal article supplement — Cancer Discov. 2024 Feb 21;14(5):804–27. doi: 10.1158/2159-8290.CD-23-0656 (PMC11061613; doi:10.1158/2159-8290.cd-23-0656), 2024-02-21
Supplement: cd-23-0656_supplementary_figure_s2_suppsf2.pdf [file cd-23-0656_supplementary_figure_s2_suppsf2.pdf]

# Supplementary Figure S2

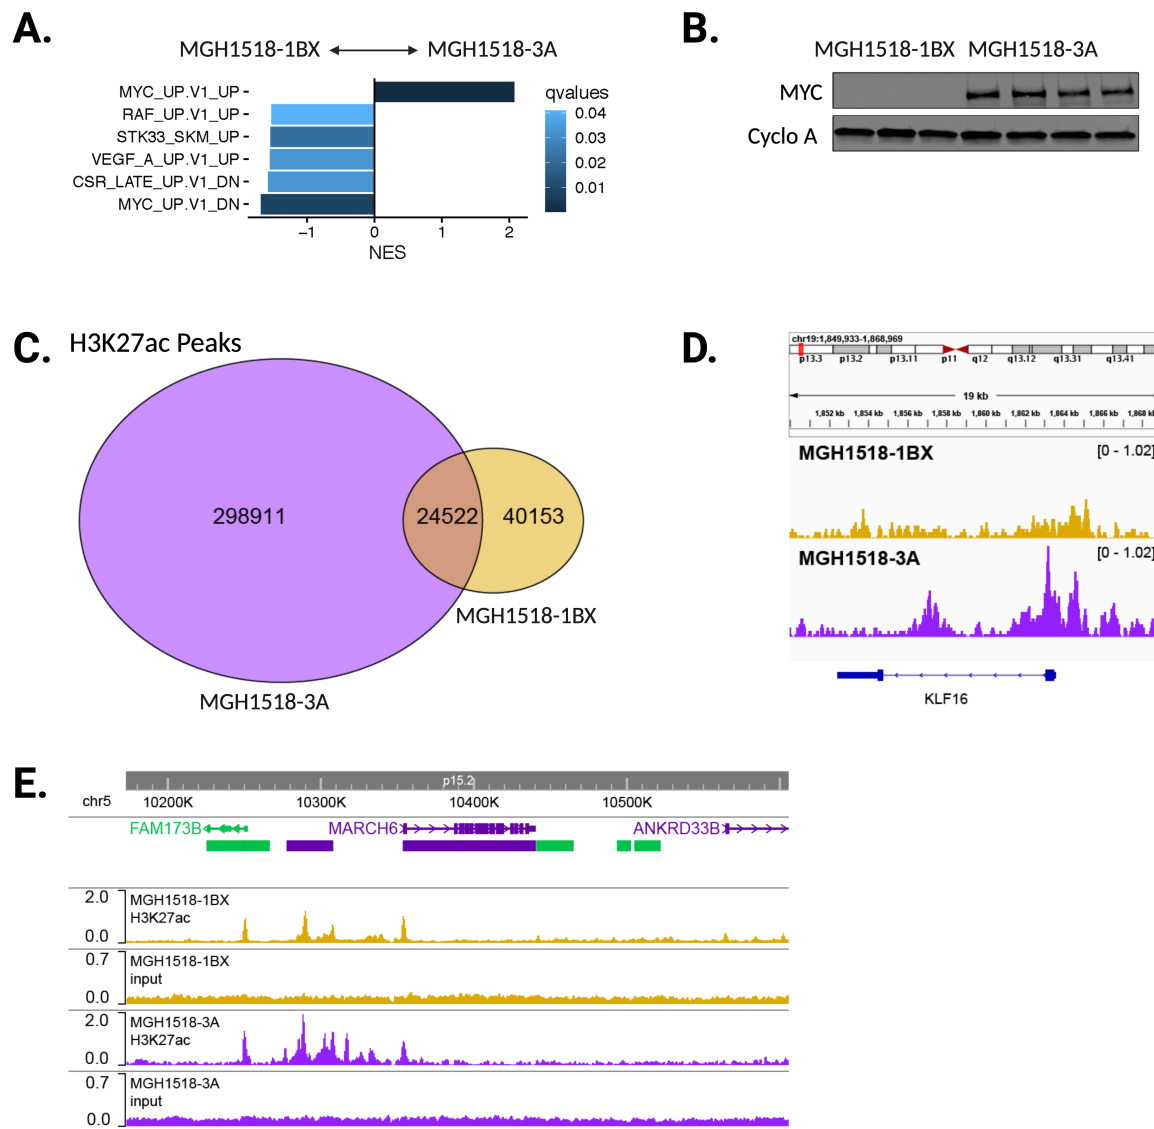

**Supplementary Figure S2. Comparison gene expression and H3K27ac between MGH1518 serial models.** (A) Gene set enrichment analysis of differentially expressed genes in MGH1518-3A vs. MGH1518-1BX. (B) MYC protein levels in replicate xenografts of MGH1518-1BX and MGH1518-3A. (C) Venn diagram depicting overlap of H3K27ac peaks between MGH1518-1BX and MGH1518-3A. (D) Increase in H3K27ac peaks in the *KLF16* locus in MGH1518-3A. Peak heights = counts per million mapped reads (CPM). (E) ChIP-seq control region on chromosome 5 that show minimal variation in normalized input and H3K27ac peaks between models. Peak heights = counts per million mapped reads (CPM). (created with BioRender.com)
