# Supplementary material for: Acquired Cross-Resistance in Small Cell Lung Cancer due to Extrachromosomal DNA Amplification of MYC Paralogs
Source: PubMed Central journal article supplement — Cancer Discov. 2024 Feb 21;14(5):804–27. doi: 10.1158/2159-8290.CD-23-0656 (PMC11061613; doi:10.1158/2159-8290.cd-23-0656), 2024-02-21
Supplement: cd-23-0656_supplementary_figure_s4_suppsf4.pdf [file cd-23-0656_supplementary_figure_s4_suppsf4.pdf]

# Supplementary Figure S4

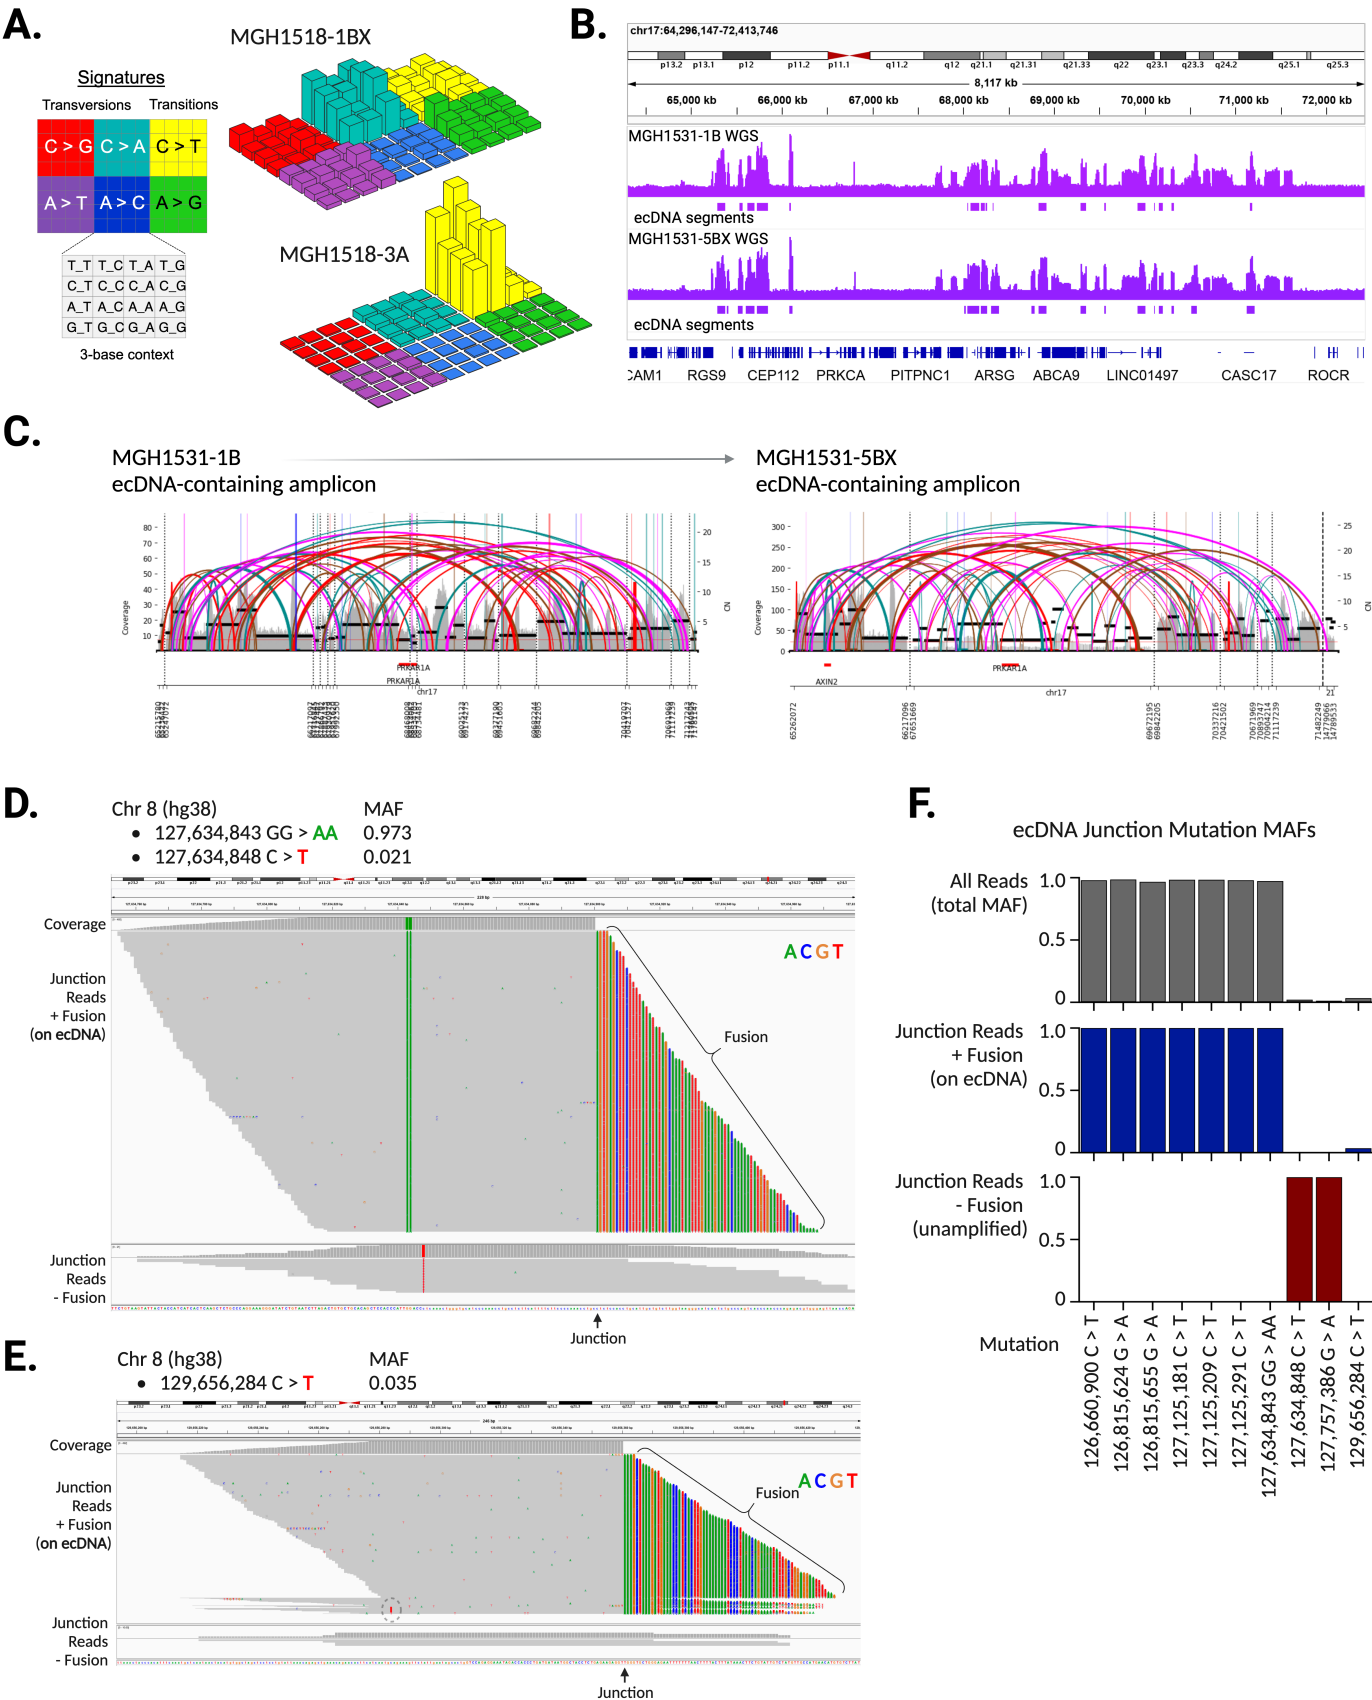

**Supplementary Figure S4. Genomic analysis of chromosome 17 focal amplification in MGH1531-5BX and analysis of ecDNA junction mutations in MGH1518-3A.** (A) Three-dimensional bar plots (also called “Lego plots”) representing mutational signatures in a three-base context for each model. (B) Copy number variation on chromosome 17 demonstrated focal amplification of discontinuous segments in both MGH1531-1B and MGH1531-5BX. Peak heights = counts per million mapped reads (CPM). (C) AmpliconArchitect reconstruction of the rearrangements that formed the shared ecDNA in the MGH1531 models. (D-E) TMZ-induced mutations that occur near ecMYC junctions, viewed on Integrative Genomics Viewer (IGV) with reads sorted by the presence (top) or absence (bottom) of an ecDNA fusion sequence (49). (D) Two TMZ-induced mutations near the same ecDNA junction, one with a high MAF that is present only on reads that contain a fusion sequence, and one with a low MAF that is present only on reads that lack a fusion. Both are detected on all reads within their fusion categories, and none in the opposite category. (E) A single sub-clonal TMZ-induced mutation was detected in a small proportion of fusion-containing junctional reads. (F) 10 TMZ-induced mutations were close enough to ecMYC junctions that their frequencies on reads that either did or did not contain a fusion sequence could be scored, as well as total MAF on all reads. (created with BioRender.com)
