# Supplementary material for: Acquired Cross-Resistance in Small Cell Lung Cancer due to Extrachromosomal DNA Amplification of MYC Paralogs
Source: PubMed Central journal article supplement — Cancer Discov. 2024 Feb 21;14(5):804–27. doi: 10.1158/2159-8290.CD-23-0656 (PMC11061613; doi:10.1158/2159-8290.cd-23-0656), 2024-02-21
Supplement: cd-23-0656_supplementary_figure_s6_suppsf6.pdf [file cd-23-0656_supplementary_figure_s6_suppsf6.pdf]

# Supplementary Figure S6

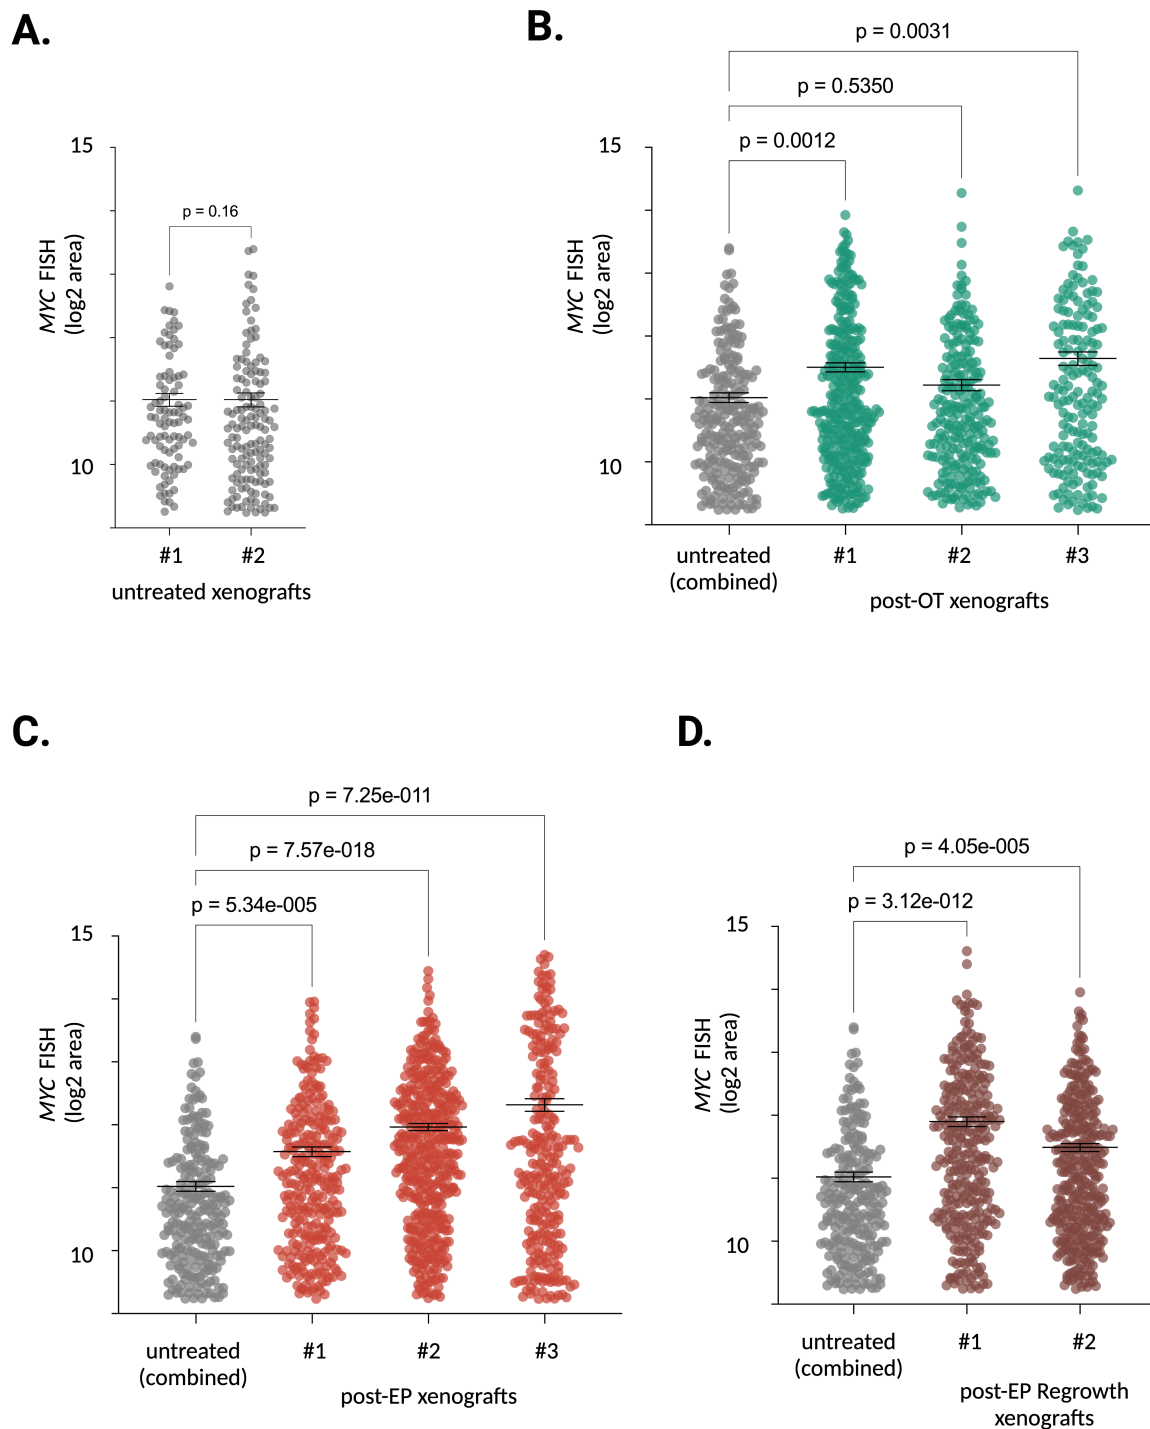

## Supplementary Figure S6. Levels of ecMYC in untreated and treated MGH1518-3A xenografts.

Measurement of MYC FISH area per cell in replicate untreated and treated xenografts. Tumor volume curves for each xenograft are shown in Comparison of distributions with non-parametric test p-values. **(A)** untreated xenografts. **(B)** OT-treated xenografts versus aggregate untreated xenografts. **(C)** EP-treated xenografts versus aggregate untreated xenografts. **(D)** Xenografts treated with reduced-dose EP followed by passage and re-growth, as described in **Fig. 4E**. Tumor volume curves for replicate xenografts are shown in **Fig. 4B-E** for each regimen, respectively. (created with BioRender.com)
