# Supplementary material for: Acquired Cross-Resistance in Small Cell Lung Cancer due to Extrachromosomal DNA Amplification of MYC Paralogs
Source: PubMed Central journal article supplement — Cancer Discov. 2024 Feb 21;14(5):804–27. doi: 10.1158/2159-8290.CD-23-0656 (PMC11061613; doi:10.1158/2159-8290.cd-23-0656), 2024-02-21
Supplement: cd-23-0656_supplementary_figure_s8_suppsf8.pdf [file cd-23-0656_supplementary_figure_s8_suppsf8.pdf]

# Supplementary Figure S8

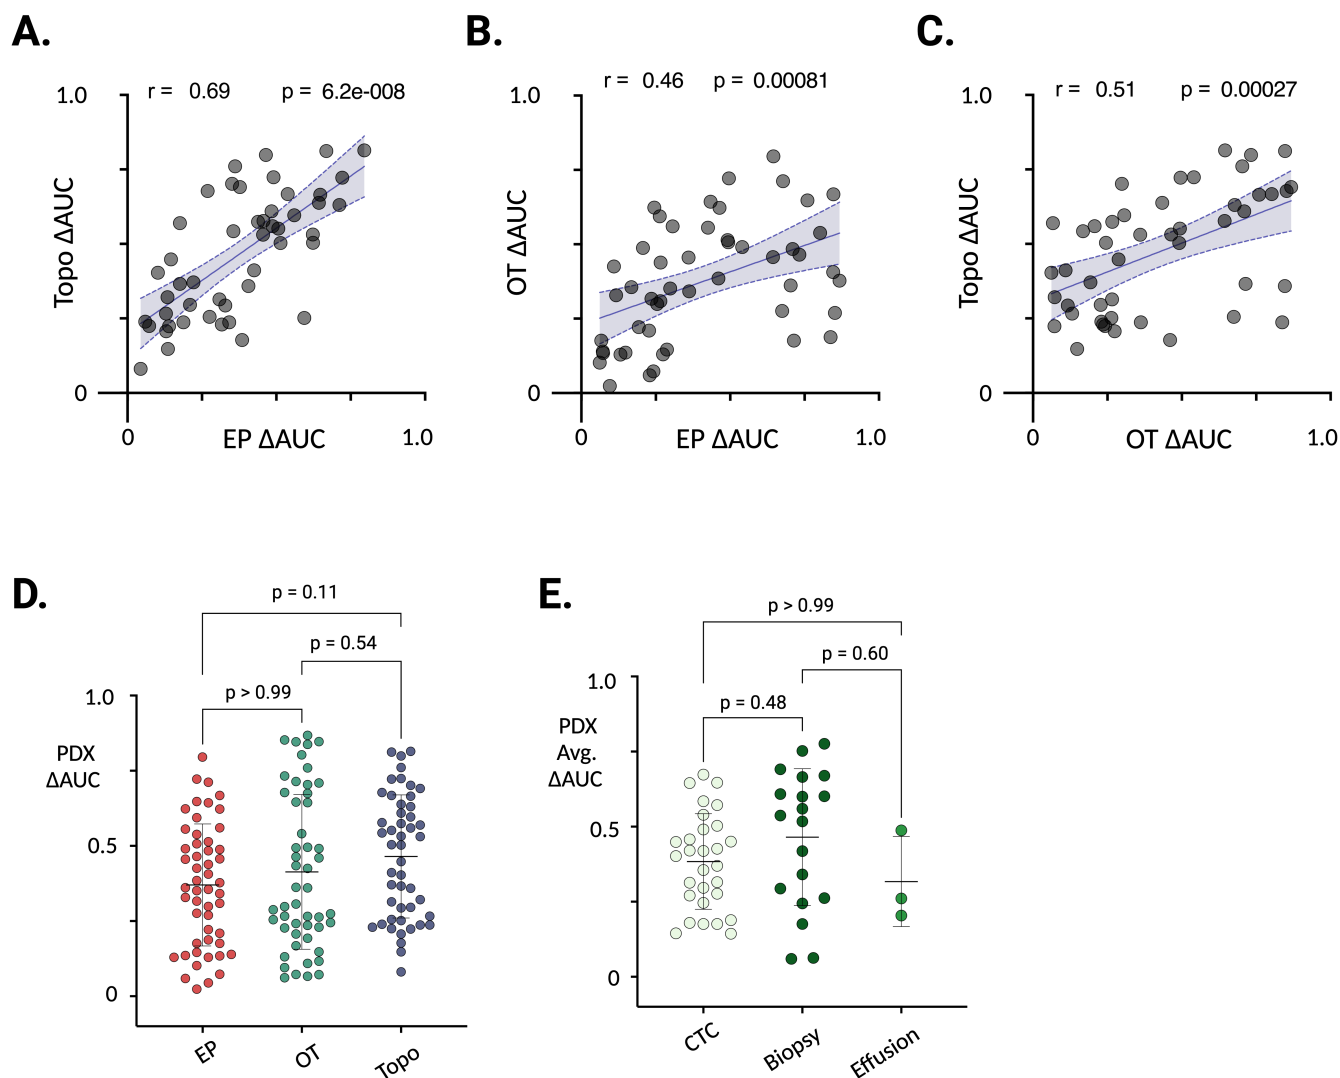

**Supplementary Figure S8. Comparison of chemotherapy regimen delta-AUC and comparison of average delta-AUC by PDX source. (A-C)** For each PDX model, pairwise comparison of  $\Delta$ AUC for each regimen. Topotecan (Topo) vs. EP (**A**), OT vs. EP (**B**), and Topo vs. OT (**C**).  $r$  = Pearson correlation, and  $p$  = probability that correlation is significant. Solid line = linear regression, dashed = 95% CI of regression. (**D**) Comparison of  $\Delta$ AUC measurement distributions for PDX models treated with EP, OT and topotecan. Kruskal-Wallis test to determine probability that differences in the three distributions could be due to random sampling. (**E**)  $\Delta$ AUC<sup>avg</sup> of PDX models derived from CTCs vs. biopsies vs. effusion specimens. Mann-Whitney test  $p$ -values for CTC-derived vs. biopsy-derived models; effusion-derived models too few for meaningful comparison. (created with BioRender.com)
