# Supplementary material for: Acquired Cross-Resistance in Small Cell Lung Cancer due to Extrachromosomal DNA Amplification of MYC Paralogs
Source: PubMed Central journal article supplement — Cancer Discov. 2024 Feb 21;14(5):804–27. doi: 10.1158/2159-8290.CD-23-0656 (PMC11061613; doi:10.1158/2159-8290.cd-23-0656), 2024-02-21
Supplement: cd-23-0656_supplementary_figure_s9_suppsf9.pdf [file cd-23-0656_supplementary_figure_s9_suppsf9.pdf]

# Supplementary Figure S9

## MYC family ecDNAs

**A.**

MGH1564-1A *MYC* ecDNA amplicon

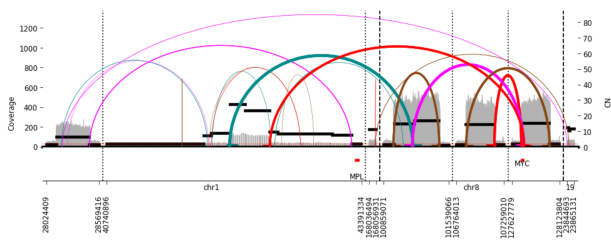

MGH1518-3A *MYC* ecDNA amplicon

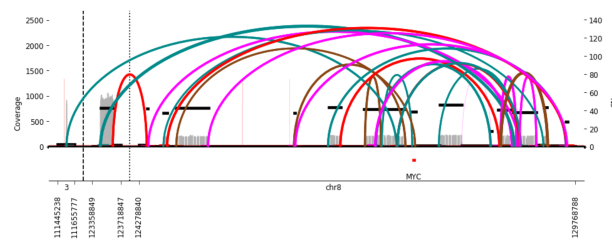

**B.**

MGH1578-3B *MYCN* ecDNA amplicon

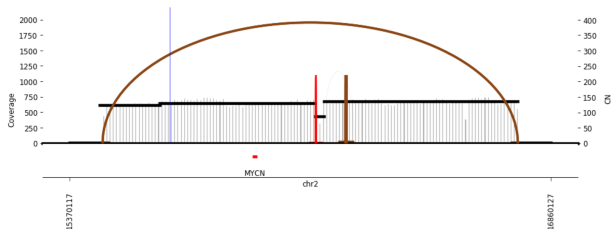

MGH1505-1A *MYCN* ecDNA amplicon

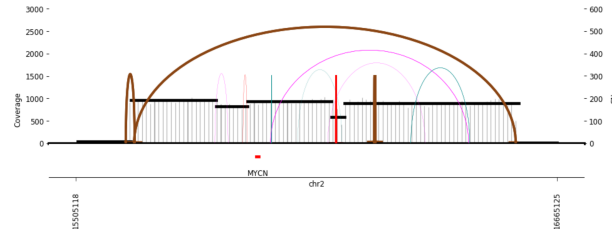

MGH1719-1A *MYCN* ecDNA amplicon

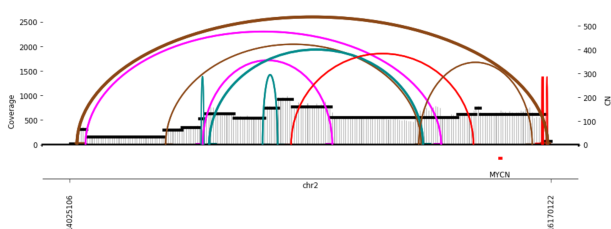

**Breakpoint Orientation**

- Forward-Reverse
- Reverse-Forward
- Forward-Forward
- Reverse-Reverse

**C.**

MGH1505-2A *MYCL* ecDNA amplicon

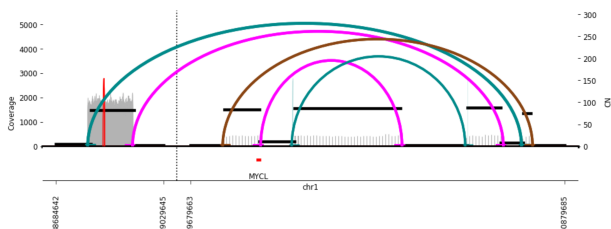

MGH1546-2A *MYCL* ecDNA amplicon

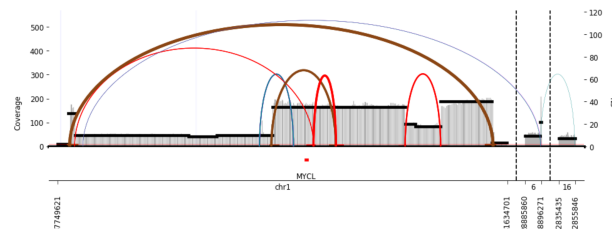

MGH1501-1A *MYCL* ecDNA amplicon

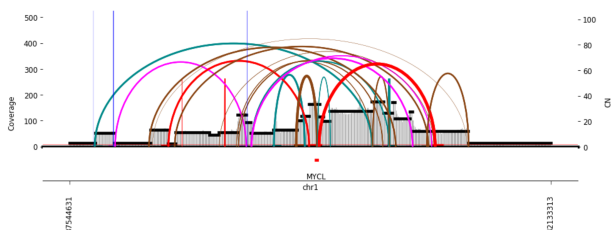

**D.**

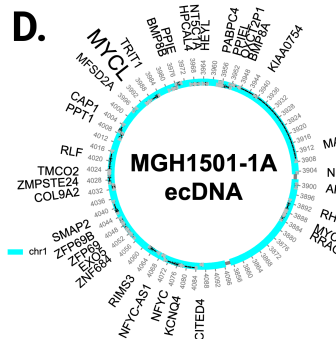

**E.**

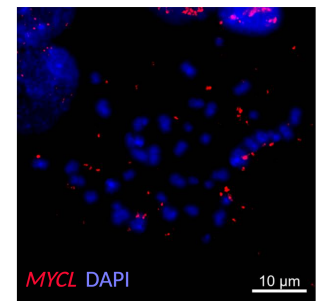

**Supplementary Figure S9. Reconstruction of ecDNAs containing *MYC* paralogs and *MYCL* FISH in MGH1501-1A metaphase chromosomes. (A-C) AmpliconArchitect reconstruction of the rearrangements that formed ecDNAs harboring *MYC* (A) or paralogs *MYCN* (B) or *MYCL* (C) in the PDX panel. (D) Consensus circular map of ec*MYCL* in MGH1501-1A. (E) FISH of probes for *MYCL* in metaphase cells from MGH1501-1A. (created with BioRender.com)**
