# Supplementary material for: Acquired Cross-Resistance in Small Cell Lung Cancer due to Extrachromosomal DNA Amplification of MYC Paralogs
Source: PubMed Central journal article supplement — Cancer Discov. 2024 Feb 21;14(5):804–27. doi: 10.1158/2159-8290.CD-23-0656 (PMC11061613; doi:10.1158/2159-8290.cd-23-0656), 2024-02-21
Supplement: cd-23-0656_supplementary_figure_s10_suppsf10.pdf [file cd-23-0656_supplementary_figure_s10_suppsf10.pdf]

# Supplementary Figure S10

**Breakpoint Orientation**  
 — Forward-Reverse    — Forward-Forward  
 — Reverse-Forward    — Reverse-Reverse

## A. Other ecDNAs (no *MYC/L/N*)

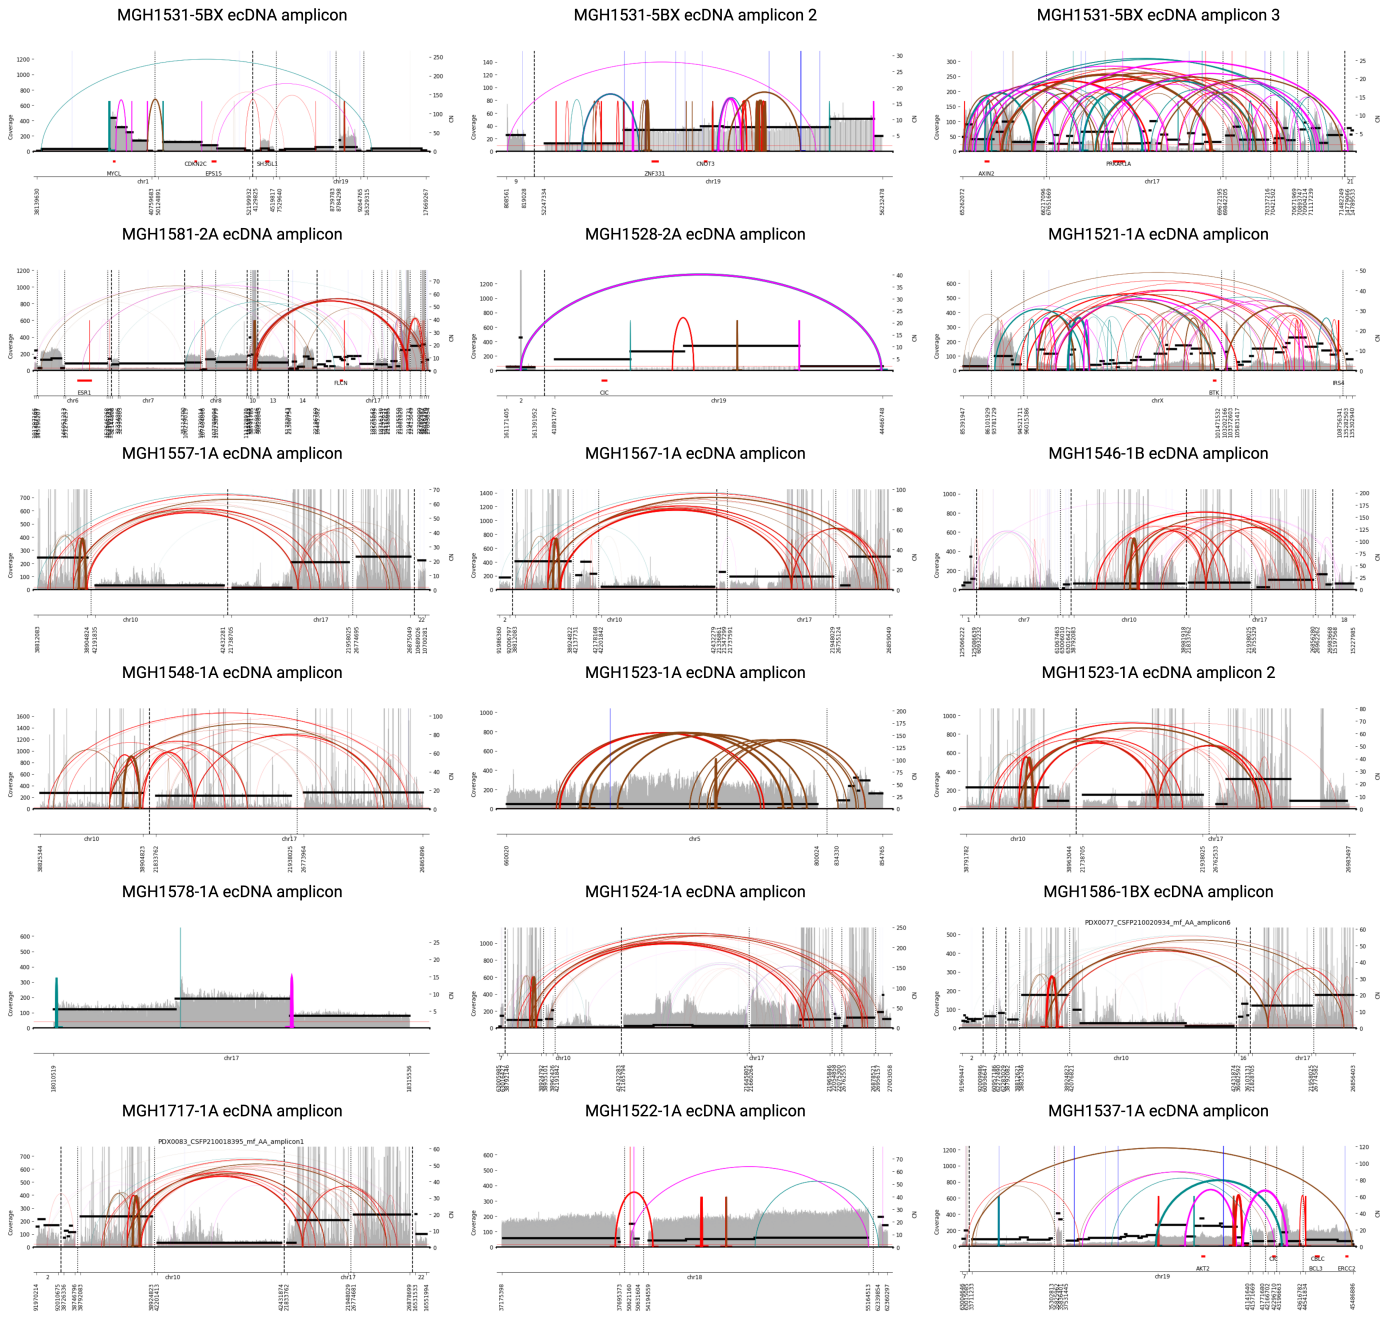

## B. Other ecDNAs (no *MYC/L/N*) in PDXs with *MYC* family ecDNAs

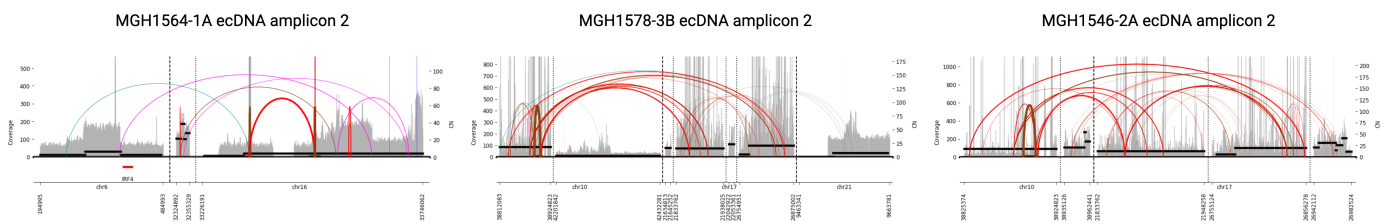

### Supplementary Figure S10. Reconstruction of ecDNAs that do not contain *MYC* paralogs.

AmpliconArchitect reconstruction of the rearrangements that formed ecDNAs that do not harbor *MYC* paralogs, either in PDXs that contain no *MYC* paralog ecDNAs (A) or in PDXs that also contain a *MYC* paralog ecDNA (B). (created with BioRender.com)
