# Supplementary material for: Acquired Cross-Resistance in Small Cell Lung Cancer due to Extrachromosomal DNA Amplification of MYC Paralogs
Source: PubMed Central journal article supplement — Cancer Discov. 2024 Feb 21;14(5):804–27. doi: 10.1158/2159-8290.CD-23-0656 (PMC11061613; doi:10.1158/2159-8290.cd-23-0656), 2024-02-21
Supplement: cd-23-0656_supplementary_figure_s11_suppsf11.pdf [file cd-23-0656_supplementary_figure_s11_suppsf11.pdf]

# Supplementary Figure S11

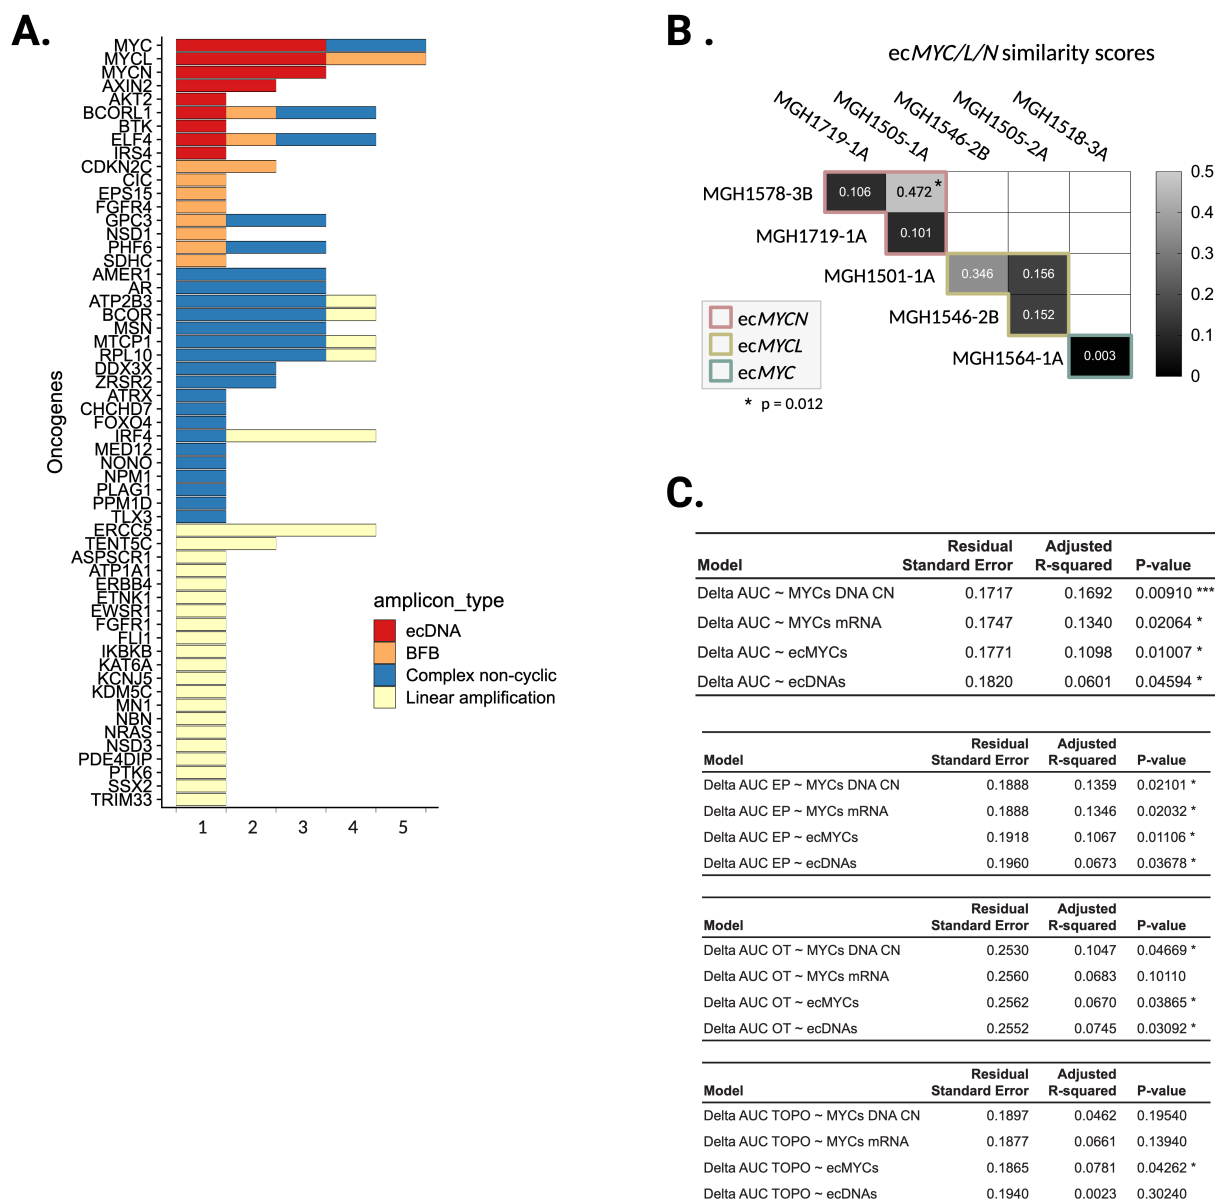

**Supplementary Figure S11. Frequency of amplified oncogenes across PDX panel, similarity of ecMYC/L/N structures, and regression analysis of average drug response versus MYC paralog copy number, expression and amplicon type. (A)** Oncogenes amplified in PDX models, ordered by frequency of amplification and by type of amplicon as annotated by AmpliconArchitect. **(B)** AmpliconClassifier similarity scores between ecDNAs harboring MYC, MYCL or MYCN from different PDX models. Only the ecMYCN amplifications between MGH1578-3B and MGH1505-1A are significantly similar in structure. **(C)** Linear regression analysis of PDX responses to individual agent EP, OT and topotecan, as well as average drug response ( $\Delta AUC^{avg}$ ), versus MYC paralog copy number, transcript level, or incorporation into an ecDNA, or presence of any ecDNA in the model. (created with BioRender.com)
