# Supplementary material for: Acquired Cross-Resistance in Small Cell Lung Cancer due to Extrachromosomal DNA Amplification of MYC Paralogs
Source: PubMed Central journal article supplement — Cancer Discov. 2024 Feb 21;14(5):804–27. doi: 10.1158/2159-8290.CD-23-0656 (PMC11061613; doi:10.1158/2159-8290.cd-23-0656), 2024-02-21
Supplement: cd-23-0656_supplementary_figure_s12_suppsf12.pdf [file cd-23-0656_supplementary_figure_s12_suppsf12.pdf]

# Supplementary Figure S12

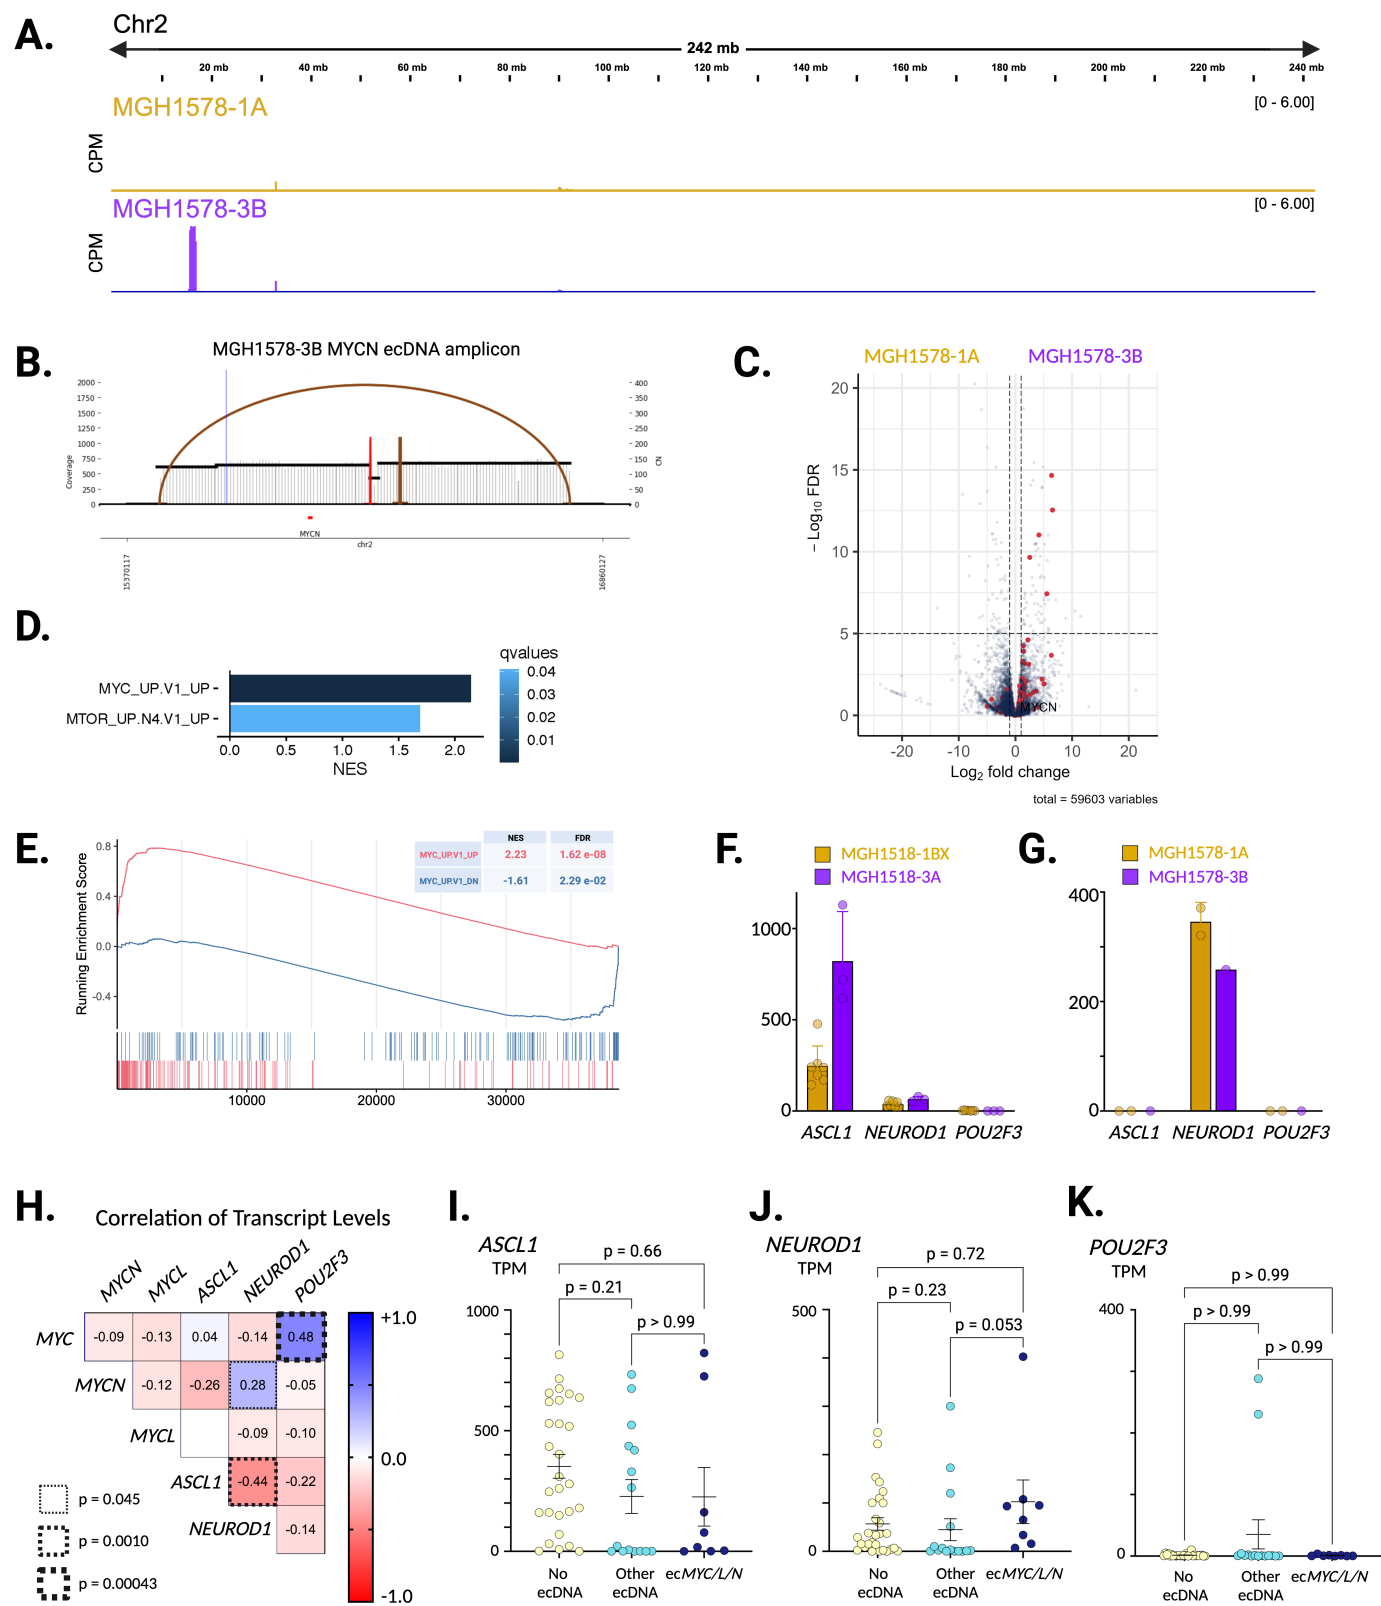

**Supplementary Figure S12. Acquired ecMYCN amplification in MGH1578 serial models and lineage oncogene expression compared with ecDNA status across the PDX panel.** (A) Focal amplification of *MYCN* on chromosome 2 in MGH1578-3B but not MGH1578-1A. Peak heights = counts per million mapped reads (CPM). (B) AmpliconArchitect reconstruction of rearrangements to form ec*MYCN* in MGH1578-3B. (C) MGH1578 PDX differential gene expression. Red = genes upregulated upon overexpression of *MYC* in primary breast epithelial cells (MYC\_UP.V1\_UP) as in **Fig. 1E**. (D) Gene set enrichment analysis of differentially expressed genes in MGH1578-3B vs. MGH1578-1A. The *MYC* and *MTOR* gene sets were the only gene sets with significant differential expression. (E) Gene set enrichment plot in MGH1578-3B vs. MGH1578-1A for genes upregulated and downregulated with *MYC* overexpression, as in **Fig. 1F**. (F-G) Serial PDX expression of neuroendocrine lineage-specific transcription factors *ASCL1*, *NEUROD1*, and *POU2F3* transcripts per million (TPM). Circles = replicate xenografts. Error bars = mean and SEM. (F) MGH1518 serial models. (G) MGH1578 serial models. (H) Pearson correlation matrix of transcripts of *ASCL1*, *NEUROD1*, *POU2F3*, *MYC*, *MYCL*, and *MYCN* across the 51-model PDX panel. 2-tailed  $p$  = probability that correlation is due to random sampling. Only  $p < 0.05$  is annotated. (I-K) Expression of neuroendocrine lineage-specific transcription factors (TPM) in models with ec*MYC/L/N* vs. models with other ecDNAs vs. models without ecDNAs. Kruskal-Wallis test  $p$ -values. (I) *ASCL1* expression. (J) *NEUROD1* expression. (K) *POU2F3* expression. (created with BioRender.com)
