# Supplementary material for: Acquired Cross-Resistance in Small Cell Lung Cancer due to Extrachromosomal DNA Amplification of MYC Paralogs
Source: PubMed Central journal article supplement — Cancer Discov. 2024 Feb 21;14(5):804–27. doi: 10.1158/2159-8290.CD-23-0656 (PMC11061613; doi:10.1158/2159-8290.cd-23-0656), 2024-02-21
Supplement: cd-23-0656_supplementary_figure_s14_suppsf14.pdf [file cd-23-0656_supplementary_figure_s14_suppsf14.pdf]

# Supplementary Figure S14

High-level focal amplifications detected by segmented CNA

WES: Wagner et al., *Nat. Comm.* 2018

**A.**

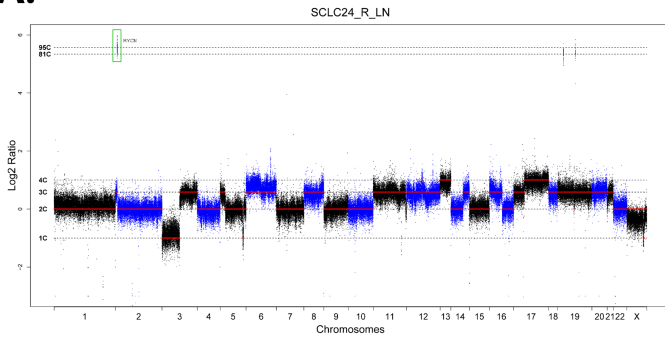

**B.**

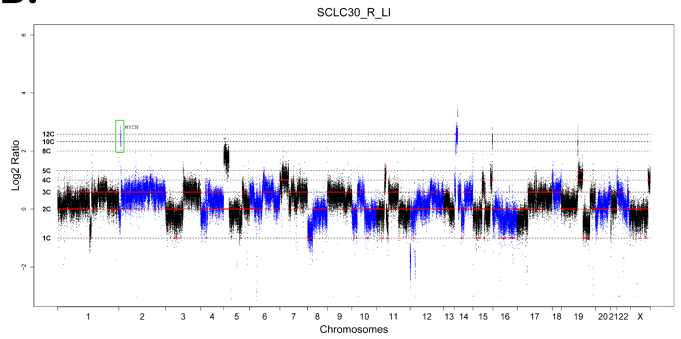

High-level focal amplifications not detected by segmented CNA

WES: Wagner et al., *Nat. Comm.* 2018

**C.**

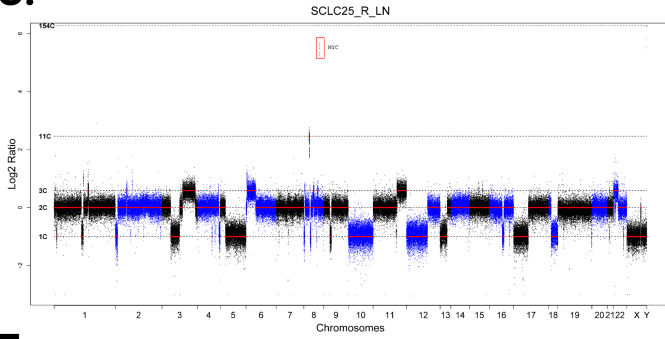

**D.**

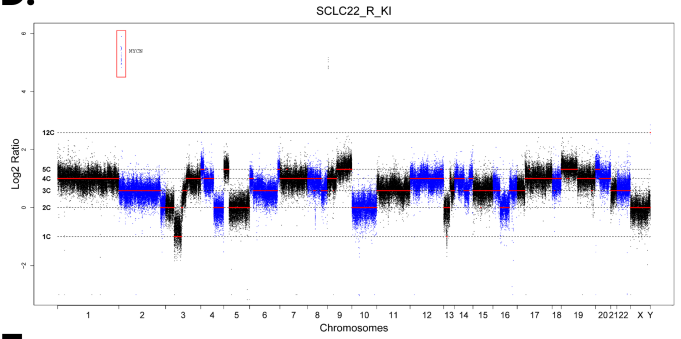

**E.**

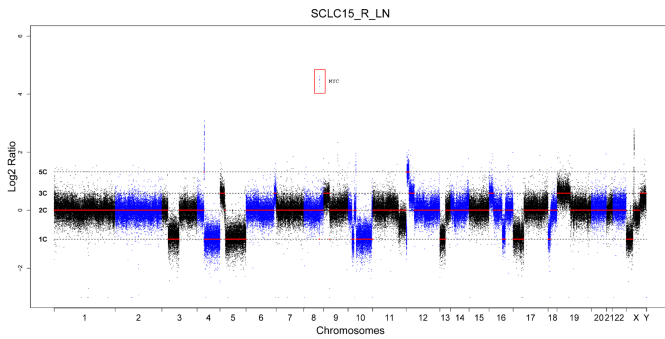

**F.**

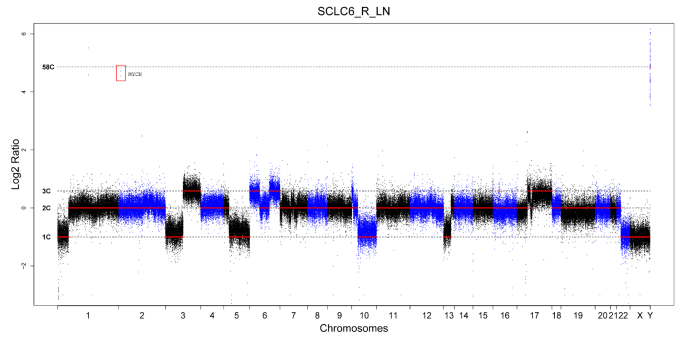

**G.**

Overall Survival

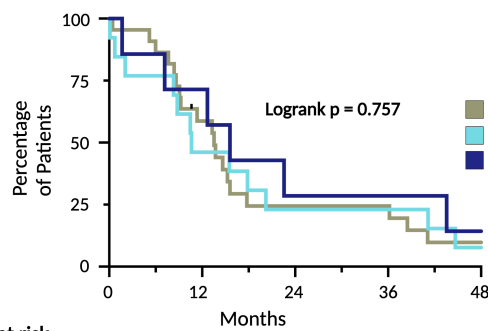

Median OS (days)

|             |     |
|-------------|-----|
| No ecDNA    | 412 |
| Other ecDNA | 373 |
| ecMYC/L/N   | 474 |

Number at risk

|             |    |    |   |   |   |
|-------------|----|----|---|---|---|
| No ecDNA    | 22 | 13 | 6 | 6 | 3 |
| Other ecDNA | 13 | 7  | 4 | 4 | 1 |
| ecMYC/L/N   | 7  | 6  | 3 | 3 | 1 |

**Supplementary Figure S14. MYC paralog amplifications that were detected or omitted by segmented copy number analysis, and patient survival compared with ecDNA status of PDX models. (A-F)** Copy number variation by exon across the genome for tumor samples from patients with relapsed SCLC, as reported in Wagner et al., 2018 (62). For these 6 patients, re-analysis of copy number detected focal *MYC* paralog amplifications. **(A-B)** *MYC* paralog amplifications detected by segmented copy number analysis, with amplified exons in green boxes. **(C-F)** *MYC* paralog amplifications detected only by unsegmented (raw) copy number analysis, with amplified exons in red boxes. **(G)** Analysis of overall survival of the 42 patients from whom PDX models were derived, categorized by ecDNA status of their models. Survival from diagnosis of SCLC to death, 4-year follow-up or loss to follow-up. For patients from whom multiple models were derived, category priority is ec*MYC/N/L* > Other ecDNA > No ecDNA. For example, patient MGH1518 categorized as ec*MYC/N/L*+ for model MGH1518-3A, even though model MGH1518-1BX lacked any ecDNA. (created with BioRender.com)
